# Supplementary material
Source: MDPI journal article supplement (https://www.mdpi.com/1424-8247/15/9/1055)
Supplement: s1 [file s1]

# Supplementary Figure S1.

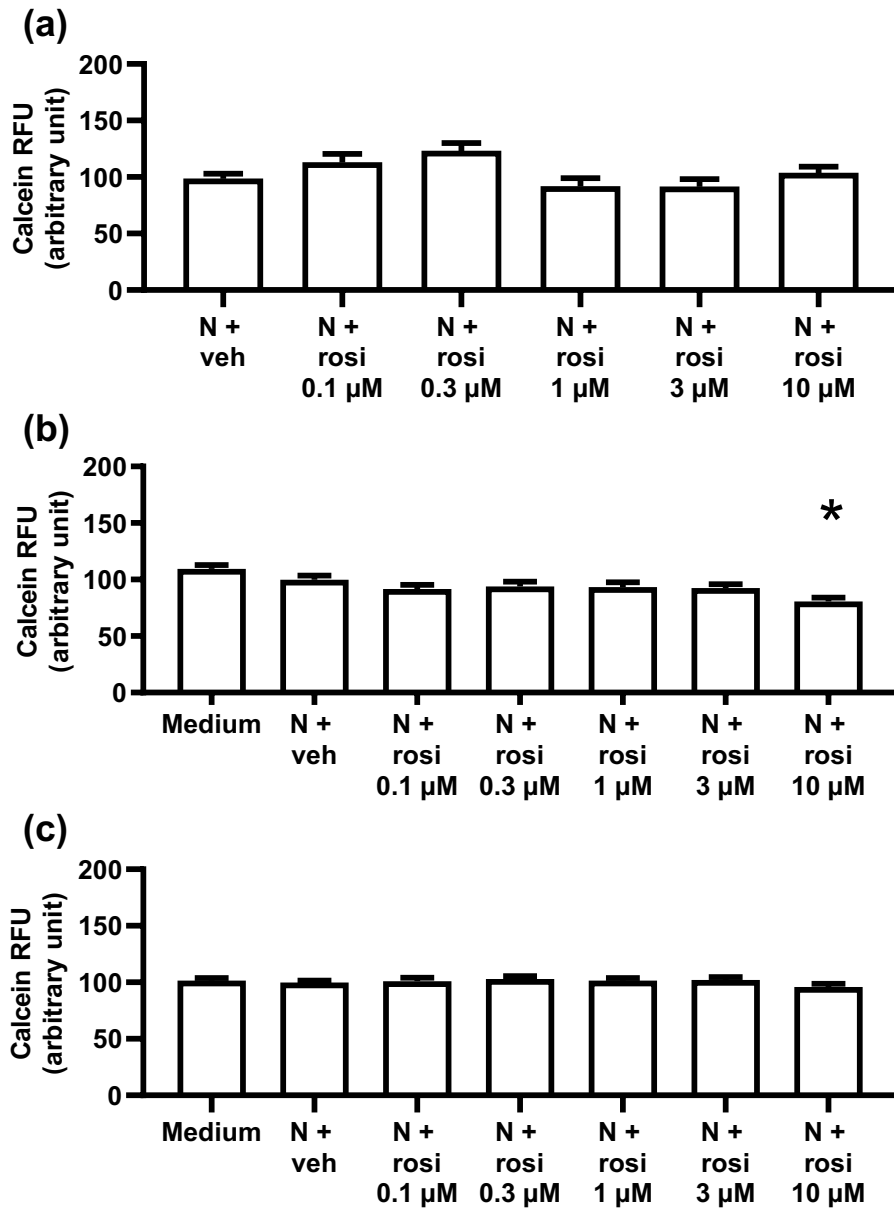

**Supplementary Figure S1. Cell viability in normoxic conditions with or without varying rosiglitazone concentrations.** Results are presented as mean with standard error. **(a): Adult rat cardiomyocytes.** Normoxia (N) + vehicle group was set to 100% relative fluorescent units (RFU), and all of the data were normalized to the averaged N + vehicle group. Rosiglitazone treatment did not aggravate cell death in normoxic conditions in adult rat cardiomyocytes. (Kruskal–Wallis, Dunn’s post hoc, \*  $p < 0.05$  vs. N + vehicle,  $n=7-9$ , 25-66 technical replicates) **(b): AC16 cell line.** Normoxia (N) + vehicle group was set to 100% RFU, and all of the data were normalized to the averaged medium treated group. Rosiglitazone treatment aggravated cell death in normoxic conditions in AC16 cells with 10  $\mu$ M. (Kruskal–Wallis, Dunn’s post hoc, \*  $p < 0.05$  vs. N + vehicle,  $n=6-7$ , 69-108 technical replicates) **(c): Differentiated AC16 cell line.** Normoxia (N) + vehicle group was set to 100% RFU, and all of the data were normalized to the averaged medium treated group. Rosiglitazone treatment did not aggravate cell death in normoxic conditions in differentiated AC16 cells. (Kruskal–Wallis, Dunn’s post hoc, \*  $p < 0.05$  vs. N + vehicle,  $n=5$ , 31-73 technical replicates)

**N:** normoxia. **veh:** vehicle. **rosi:** rosiglitazone. **RFU:** relative fluorescence unit.

# Supplementary Table S1.

Body-weight-development of rats under chronic rosiglitazone treatment

|                            | day-1      | day0       | day1       | day2       | day3       | day4       | day5       | day6       | day7       | day8       |
|----------------------------|------------|------------|------------|------------|------------|------------|------------|------------|------------|------------|
| Mean +/- SEM vehicle       | 96.1 ±2.3  | 102.5 ±1.9 | 111.1 ±2.0 | 118.9 ±2.1 | 125.9 ±2.2 | 134.9 ±2.3 | 143.0 ±2.4 | 150.7 ±2.5 | 158.4 ±2.5 | 166.8 ±2.6 |
| Mean +/- SEM rosiglitazone | 94.7 ±2.3  | 103.2 ±1.7 | 110.7 ±1.8 | 118.5 ±1.9 | 125.9 ±2.0 | 133.9 ±2.0 | 141.5 ±2.2 | 148.1 ±2.1 | 156.1 ±2.2 | 163.4 ±2.3 |
|                            | day9       | day10      | day11      | day12      | day13      | day14      | day15      | day16      | day17      | day18      |
| Mean +/- SEM vehicle       | 174.3 ±2.7 | 180.3 ±3.5 | 190.1 ±3.0 | 197.0 ±3.0 | 204.1 ±3.0 | 211.5 ±3.2 | 221.8 ±4.0 | 226.5 ±3.4 | 234.1 ±3.5 | 242.4 ±3.6 |
| Mean +/- SEM rosiglitazone | 170.5 ±2.4 | 177.5 ±2.4 | 185.5 ±2.7 | 192.1 ±2.7 | 198.6 ±2.8 | 204.8 ±2.8 | 212.3 ±2.8 | 219.2 ±3.0 | 225.9 ±2.9 | 234.3 ±3.0 |
|                            | day19      | day20      | day21      | day22      | day23      | day24      | day25      | day26      | day27      | day28      |
| Mean +/- SEM vehicle       | 249.7 ±3.6 | 257.0 ±3.7 | 263.7 ±4.0 | 272.3 ±3.8 | 277.9 ±4.1 | 284.3 ±4.3 | 290.6 ±4.5 | 293.7 ±5.4 | 302.6 ±4.8 | 307.8 ±4.8 |
| Mean +/- SEM rosiglitazone | 241.4 ±3.1 | 245.0 ±3.8 | 254.2 ±3.2 | 261.3 ±3.3 | 267.9 ±3.4 | 271.5 ±3.7 | 278.7 ±3.4 | 282.4 ±4.5 | 288.9 ±3.8 | 295.6 ±3.8 |

**Supplementary Table S1. Weight development of male Wistar rats under chronic rosiglitazone treatment vs. vehicle.** Results are presented as mean ± SEM. During the 28-day treatment, the weight gain did not change with rosiglitazone treatment compared to the vehicle group (1% hydroxyethyl-cellulose).(Mixed effect analysis, Sidak’s post hoc, day -1: n=25, day 0-28: n=40)

# Supplementary Table S2.

Heart rate measurement during surgical protocol in rats

| surgical period                   | start      | ischemia   |            |             |            | reperfusion |            |            |  |
|-----------------------------------|------------|------------|------------|-------------|------------|-------------|------------|------------|--|
| time                              | 0 min      | 45 min     | 60 min     | 75 min      | 100 min    | 130 min     | 160 min    | 190 min    |  |
| Mean +/- SEM<br>I/R vehicle       | 452<br>±15 | 429<br>±19 | 386<br>±41 | 416<br>±17  | 412<br>±19 | 430*<br>±16 | 431<br>±21 | 417<br>±22 |  |
| Mean +/- SEM<br>I/R rosiglitazone | 427<br>±11 | 436<br>±23 | 426<br>±20 | 426*<br>±12 | 425<br>±15 | 402<br>±11  | 396<br>±18 | 410<br>±17 |  |
| Mean +/- SEM<br>IPC vehicle       | 425<br>±18 | 422<br>±18 | 387<br>±14 | 395<br>±16  | 401<br>±14 | 396<br>±14  | 404<br>±14 | 404<br>±18 |  |
| Mean +/- SEM<br>IPC rosiglitazone | 427<br>±30 | 397<br>±13 | 390<br>±21 | 375<br>±13  | 378<br>±15 | 368<br>±15  | 369<br>±15 | 367<br>±16 |  |

**Supplementary Table S2. Mean heart rate was monitored throughout the entire in vivo surgery protocol.** Results are presented as mean ± SEM. There is no meaningful difference between the treatment groups with respect to the heart rate. (Mixed effect analysis, Tukey’s post hoc, \*  $p < 0.05$  vs. IPC rosiglitazone, n=9-13)

# Supplementary Table S3.

Blood pressure measurement during surgical protocol in rats

| Surgical period                   | start         | ischemia     |              |               |              | reperfusion  |              |              |
|-----------------------------------|---------------|--------------|--------------|---------------|--------------|--------------|--------------|--------------|
| time                              | 0 min         | 45 min       | 60 min       | 75 min        | 100 min      | 130 min      | 160 min      | 190 min      |
| Mean +/- SEM<br>I/R vehicle       | 96,3<br>±9    | 81,1<br>±6,2 | 60,9<br>±7   | 78,1<br>±6,9  | 75,3<br>±4,1 | 78,8<br>±4,7 | 75,4<br>±5,4 | 76,5<br>±4,5 |
| Mean +/- SEM<br>I/R rosiglitazone | 102,2<br>±8,9 | 63,2<br>±8,6 | 76<br>±8,2   | 85,3<br>±12,7 | 85,4<br>±6,7 | 83,2<br>±7,1 | 91,7<br>±8,5 | 86,7<br>±6,8 |
| Mean +/- SEM<br>IPC vehicle       | 96,2<br>±7    | 74,5<br>±5,3 | 62,7<br>±6,6 | 89,6<br>±3,9  | 84,2<br>±4,8 | 80,6<br>±5,4 | 79,9<br>±3   | 80,5<br>±5,8 |
| Mean +/- SEM<br>IPC rosiglitazone | 93,8<br>±4,7  | 75,2<br>±5,1 | 68<br>±6,1   | 78,3<br>±6,1  | 80,3<br>±5,3 | 74<br>±5,6   | 77,2<br>±4,4 | 75,4<br>±5,6 |

**Supplementary Table S3. Mean arterial blood pressure was monitored throughout the entire in vivo surgery protocol.** Results are presented as mean ± SEM. There is no significant difference between the treatment groups with respect to the blood pressure. (Mixed effect analysis, Tukey’s post hoc, n=9-13)
